# Supplementary material
Source: PubMed Central journal article supplement (PMC4367248)
Supplement: supp_M114.626747_jbc.M114.626747-1.pdf [file supp_M114.626747_jbc.M114.626747-1.pdf]

aactattgaacatagtaacacttttgaacagtagaggagcatcagggttcattattggctcataatgcctatgtccattgtgccatctgctatggactatcgtctcaagatccacagaagagcactgttaatt  
ccagccgtccattaagaagctcttacagcagttgtggctcctcttctatctgttggttcccttcaactggtggcccttttagtacaactggtttaaagagtcattgttttagtggtcgttacaataatttgcacatgtgg  
gttaccacaaccagctcattggcctacttcaatagttgcctcaatccaatgctctatgttttcatgggccaggacttccgagagagactgattcattccctccctccagctggagagagccctgagtgaggactct  
ggccaaaccagtgatacagcagcttctgtcttaccctctgcagacattgagataaaaagaatfatga  
rFpr2c  
atggaaccaactcctccatccaatgagtgatcagaagtaagtgttaagatttaccatctccagagttctgtgatcctcaaatggtggttctgtccatcacattgtccttgggttctggtaatggactagt  
gatctgggtagctggattccgatggcacacactgtcaccaccactgttatctgaatctagcttggctgactcttttccacagcgcacttaccattttcatctcaactgctatggaaaggaaatggccttttg  
ctggttctgtgcaaaattactttatattgagatgcaatggaattggaagtatcttctgacttgaatttcaacttggccttggaccctgtatttctgtctgtccatcctggtgctcagaaccaccgactgtgagcct  
ggctagaaaggtgttattggaccctgatttttggctgattctcagttgacacattttttcataatagatagatttctggaggggatgtactgtgtactactttccatctctgggtaaacactgatgag  
gaaatgttgaacacagtttcatitttacaactgctctagggatcatcaagttcattattatcttataataccatgtccattgttccatctgctatggactcattgtctcaagatccagagaagacccttgttaattct  
agccgtgttcacagctcctaagagcagttgtggcttcttcttctgttggcttcccttcaactggttcccttttaagcctagtgtgtttaaagagagattgttaaatgatgataaaaatttgcacatgttgatt  
atgccaaacactcattggccttctcaatagttgcctcaatccaactctatgttttcatgggccaggacttccgaaagagactgattcattccctccctccagatttggagagagccctaagtgggactctgttc  
aaacaaataactggcacaattctgttaccctctgcaaacattgagatgatcaatga  
dog FprL1  
atggaacaacactcctccatccctctgaatgatccgaaagatgctccatgagctgtgctgctacaagttctgcatactctgccattggtggtcctgggatcacttctgtccttggcatcctgggcaatgggct  
tgtgatctgggtgctggattccggatggcacgcacagctaccacaatctgttacctgaacctggccttagctgacttcttccactgaccaccctaccattctcattgtctcaatggctatgagagaactgtggcc  
ttttgctgttctctatgcaaggtgattcatattgtgtggacattaacctgttggaaagtgttctctcattgtcttattgccttggaccctgtatttctgtctgtcctgcatccagctggcccagaaccaccgtacagt  
aagccttctcaaaagtgtacattggacccttggattcttgcctcaatccttacccttggcatttctctgactacagtaaatgatggaacagggaaatatactgtactttcaatttgcacatcctgggcaacagt  
attgaagagagattgaaggtggccatccatgttgacagccagagggatcctccgtttatcattgttctcagatgccaatgtccatcgttctatctgtacgggctcattgtcgaagatacaaaaaaag  
cttgatgtaaaaccagctgtcccttacgggtccttactgtgtgtggcttcttctctgtgttggcttcccttcaactgattgccccttttagcaccagctggctcaaaagagatgtgtttgaaagttaagtaaaaaat  
ctgacgtctgtgtaaaacacagagctccctggccttctcaacagctgctcaacccaatgctctacgttctcattggccaagacttccgagagagactgatccactcctctgctccagctgtgagagggcc  
cttagtagagatgtaaccagaccactgacacaacagccaatctgctttaccatctcgaagcagagttacagcaatgtgagctcttgcggccctcag  
rabbit FprL1  
atggaagcaacatcctccctctgaatgatccgaaagatgctctatgagctgtccggctacactgctctgcggatcctcccgtgattgtacttggggtcacttctgtctggcatcctgggcaatgggct  
tgtgatctgggtgctgggttccggatggcacacacagctaccacaatctgttacctgaacctggccttggctgacttcttccactgctaccctaccattcctcctcctcaatggccatgggagaaaaatgg  
ccttttggcttctgtgcaagctgttccactgtgtggacataaactgtttggcagcgtcttctctgatagcgttcttgccttgaccctgctcattgtgttgcaccaatctgggctcagaatcaccgca  
ctgtaaacctagccaggaagatgatcgtggaccctggattcttgcctcaatcctgacctgccaatctcattgttcttaccacagttgagggatgagaagggaaacatactgactttcaattttagctcctggg  
gtgacaccttggaaagagagtgacgggtggccaccaccactactgacggtcagaggtatcctccttggatcgttggcttgcagttcagttgccaatgtccatcgtcgtatctgtcagggctcattgtcgaagatgca  
caaaaaaggcatgataaaatccagccctccttaccgggtcctcactgctgtgtggcttcttctcactgctggttccccttcaactgatcgcctctgagcacggctggtcctcaagagatgctgttctgctgga  
aagtaccagatctcaactcctgtgtaaaccaaccagctcccttgccttcaacagctgctcaacccatgctctacgttcttctgtggccaggacttccgagagcgtctcactcctcctcccgccagt  
ctggagaggccctgagtgaggaccggcccccagcaaatgacacagctgccaactccactcacttctactgaggtgagttacaggtgctgtga  
hamster Fpr1  
atggacaccaacatctctcctcatgaactgtctgagcgaactcctaatatctgcaagaagcagctcagttctgtgcttacacggctctgaatgtcttctcactatgatgttggaaatcacttctcct  
tggagtctgggcaatgggctcgtgatctgggtggccgcttccgaatgttccgcacagctaccaccatcttacttgaacctggccattgctgacttctgttaccctcacgctcccgtttttatcgcctctaa  
ggccatgggagacaatggcatttgggttcatgtgcaagttcattaccatagtagacataaacctgttggaaagtgttctcctgacgccctcattgctgtagaccctgtatttctgtcctgcatccagct  
gggctcagaaccacagaaccgtgagcttggccaagaaatattatcggaccctggatttcttctcctccttggcagttatcattgctgaccacgatcccaataaacctgggccagggaacacagc  
ctgctctttgacttctccccttggaccaaaagatcctgtagagaagaaaaagggtggccatcaccatgcttaccatcagaggaattatcagattcatttggttcagcacaccctgtccattgttccatttctatg  
ggctcatagccactaaaatccacaggaaggctgatcaaatccagccgtcccctggggctcctcttcttctgtgctgctcttcttctctgtggtgccatttccaggtagtagccctcatatccacaattta  
gagtcagtgaaccagcagctaccagcctcacaactgcagtgaaagctcacaagctcttggccttctcaacagctgctcaacccaatgctctatgtcttcatggccaggacttcagagagagactaatc  
cactcctcctgcaagctagagaggccctttagtgaggactcaggccagaccgaacacagcagatcaacttggcaacaattcctgttacccttctgaagacagtgaacagggcaaaatga

**Supplemental Table S1. Overview of FPR sequences used in this study.**
